# Supplementary material for: Determination of Nitrate Migration and Distribution through Eutric Cambisols in an Area without Anthropogenic Sources of Nitrate (Velika Gorica Well Field, Croatia)
Source: MDPI journal article supplement (doi:10.3390/su152316529), 2023-12-04
Supplement: s1 [file sustainability-2683073-supplementary.pdf › sustainability-2683073-supplementary.pdf]

**Table S1.** Descriptive statistics of soil moisture content, soil temperature, isotopic, and chemical compositions for soil water samples.

|                           |      | A      | 2B     | 3BC    | C      |
|---------------------------|------|--------|--------|--------|--------|
| Soil moisture content (%) | Mean | 36.51  | 35.60  | 32.08  | 23.19  |
|                           | Min  | 19.69  | 21.75  | 25.05  | 19.15  |
|                           | Max  | 45.21  | 42.25  | 35.37  | 24.79  |
|                           | SD   | 9.32   | 8.03   | 3.93   | 2.15   |
| Soil temperature (°C)     | Mean | 14.04  | 13.88  | 14.76  | 14.53  |
|                           | Min  | 2.88   | 3.68   | 5.46   | 6.22   |
|                           | Max  | 25.88  | 24.95  | 25.14  | 24.23  |
|                           | SD   | 8.31   | 7.82   | 7.33   | 6.65   |
| $\delta^2H$ (‰)           | Mean | -58.06 | -57.86 | -49.83 | -47.41 |
|                           | Min  | -74.64 | -69.59 | -51.68 | -50.64 |
|                           | Max  | -30.17 | -46.97 | -46.83 | -44.00 |
|                           | SD   | 12.70  | 7.39   | 1.63   | 2.65   |
| $\delta^{18}O$ (‰)        | Mean | -8.52  | -8.65  | -7.68  | -7.32  |
|                           | Min  | -10.68 | -10.07 | -7.84  | -7.68  |
|                           | Max  | -4.24  | -6.96  | -7.44  | -6.94  |
|                           | SD   | 1.83   | 1.00   | 0.15   | 0.32   |
| <i>d</i> -excess (‰)      | Mean | 10.13  | 11.31  | 11.60  | 11.15  |
|                           | Min  | 3.75   | 8.71   | 10.64  | 10.19  |
|                           | Max  | 13.76  | 13.97  | 12.69  | 12.01  |
|                           | SD   | 2.64   | 1.36   | 0.67   | 0.55   |
| $F^-$ (mg/L)              | Mean | 0.14   | 0.31   | 0.32   | 0.11   |
|                           | Min  | 0.06   | 0.06   | 0.05   | 0.06   |
|                           | Max  | 0.34   | 1.48   | 1.99   | 0.18   |
|                           | SD   | 0.08   | 0.42   | 0.68   | 0.04   |
| $Cl^-$ (mg/L)             | Mean | 2.82   | 3.51   | 2.51   | 1.55   |
|                           | Min  | 0.39   | 0.22   | 0.45   | 0.49   |
|                           | Max  | 6.61   | 10.96  | 8.69   | 3.01   |
|                           | SD   | 2.31   | 2.96   | 2.79   | 1.03   |
| $NO_2^-$ (mg/L)           | Mean | 1.26   | 0.15   | 0.13   | 1.76   |
|                           | Min  | 0.70   | 0.02   | 0.05   | 0.22   |
|                           | Max  | 2.52   | 0.29   | 0.23   | 2.70   |
|                           | SD   | 0.72   | 0.12   | 0.08   | 1.03   |
| $NO_3^-$ (mg/L)           | Mean | 0.52   | 0.65   | 0.78   | 5.00   |
|                           | Min  | 0.03   | 0.01   | 0.20   | 2.54   |
|                           | Max  | 1.50   | 2.23   | 2.50   | 6.80   |
|                           | SD   | 0.53   | 0.76   | 0.88   | 1.59   |
| $PO_4^{3-}$ (mg/L)        | Mean | 2.06   | 2.18   | 3.17   | 2.19   |
|                           | Min  | 1.11   | 0.66   | 1.56   | 1.70   |
|                           | Max  | 2.97   | 3.26   | 4.33   | 2.97   |
|                           | SD   | 0.80   | 1.01   | 1.10   | 0.57   |
| $SO_4^{2-}$ (mg/L)        | Mean | 6.18   | 1.50   | 15.15  | 5.95   |

|                  |      |       |       |       |        |
|------------------|------|-------|-------|-------|--------|
| $Na^+$ (mg/L)    | Min  | 0.97  | 0.54  | 7.34  | 3.71   |
|                  | Max  | 14.88 | 3.31  | 35.13 | 9.56   |
|                  | SD   | 3.75  | 0.90  | 8.59  | 2.22   |
|                  | Mean | 2.59  | 1.86  | 5.53  | 4.11   |
| $NH_4^+$ (mg/L)  | Min  | 0.68  | 0.81  | 3.12  | 2.71   |
|                  | Max  | 3.67  | 2.65  | 12.55 | 8.65   |
|                  | SD   | 1.11  | 0.59  | 3.03  | 2.55   |
|                  | Mean | 0.55  | 0.56  | 4.35  | 0.85   |
| $Mg^{2+}$ (mg/L) | Min  | 0.13  | 0.10  | 0.99  | 0.22   |
|                  | Max  | 3.02  | 1.38  | 9.20  | 3.01   |
|                  | SD   | 0.84  | 0.45  | 3.04  | 1.21   |
|                  | Mean | 16.15 | 21.55 | 48.47 | 45.37  |
| $K^+$ (mg/L)     | Min  | 0.54  | 0.44  | 41.02 | 41.17  |
|                  | Max  | 25.87 | 40.49 | 61.63 | 49.56  |
|                  | SD   | 7.98  | 12.62 | 7.84  | 3.86   |
|                  | Mean | 0.31  | 0.33  | 1.36  | 0.95   |
| $Ca^{2+}$ (mg/L) | Min  | 0.18  | 0.09  | 0.28  | 0.44   |
|                  | Max  | 0.76  | 0.97  | 5.00  | 2.10   |
|                  | SD   | 0.17  | 0.29  | 1.56  | 0.66   |
|                  | Mean | 61.64 | 60.74 | 56.53 | 77.64  |
|                  | Min  | 6.15  | 36.56 | 33.78 | 62.66  |
|                  | Max  | 90.31 | 82.93 | 85.37 | 101.33 |
|                  | SD   | 22.33 | 14.89 | 17.13 | 17.25  |

**Table S2.** The results of testing the assumptions of normality of soil moisture content, soil temperature, isotopic, and chemical compositions for soil water samples.

| Shapiro–Wilk test     | A    |         | 2B   |        | 3BC  |       | C    |       |
|-----------------------|------|---------|------|--------|------|-------|------|-------|
|                       | W    | p       | W    | p      | W    | p     | W    | p     |
| Soil moisture content | 0.84 | 0.03    | 0.76 | 0.003  | 0.76 | 0.004 | 0.73 | 0.002 |
| Soil temperature      | 0.92 | 0.26    | 0.91 | 0.23   | 0.91 | 0.19  | 0.91 | 0.25  |
| $\delta^2H$           | 0.93 | 0.36    | 0.96 | 0.81   | 0.94 | 0.62  | 0.89 | 0.25  |
| $\delta^{18}O$        | 0.90 | 0.20    | 0.95 | 0.62   | 0.91 | 0.35  | 0.86 | 0.12  |
| <i>d-excess</i>       | 0.84 | 0.04    | 0.95 | 0.58   | 0.94 | 0.57  | 0.98 | 0.94  |
| $F^-$                 | 0.85 | 0.04    | 0.64 | 0.0001 | 0.46 | 0.00  | 0.92 | 0.55  |
| $Cl^-$                | 0.87 | 0.08    | 0.86 | 0.05   | 0.75 | 0.01  | 0.93 | 0.61  |
| $NO_2^-$              | 0.79 | 0.05    | 0.90 | 0.39   | 0.83 | 0.10  | 0.91 | 0.44  |
| $NO_3^-$              | 0.80 | 0.01    | 0.81 | 0.02   | 0.72 | 0.003 | 0.94 | 0.70  |
| $PO_4^{3-}$           | 0.88 | 0.29    | 0.90 | 0.33   | 0.92 | 0.56  | 0.90 | 0.43  |
| $SO_4^{2-}$           | 0.92 | 0.31    | 0.85 | 0.04   | 0.75 | 0.01  | 0.90 | 0.43  |
| $Na^+$                | 0.86 | 0.05    | 0.94 | 0.46   | 0.74 | 0.01  | 0.62 | 0.001 |
| $NH_4^+$              | 0.54 | 0.00004 | 0.84 | 0.03   | 0.90 | 0.27  | 0.60 | 0.001 |
| $Mg^{2+}$             | 0.88 | 0.11    | 0.91 | 0.27   | 0.88 | 0.19  | 0.88 | 0.32  |
| $K^+$                 | 0.71 | 0.0006  | 0.79 | 0.01   | 0.70 | 0.002 | 0.73 | 0.02  |
| $Ca^{2+}$             | 0.87 | 0.08    | 0.95 | 0.67   | 0.97 | 0.88  | 0.87 | 0.26  |

**Table S3.** The results of testing the assumptions of homogeneity of soil moisture content, soil temperature, isotopic, and chemical compositions for soil water samples.

| <i>Levene's test</i>                       |        |    |        |       |         |        |
|--------------------------------------------|--------|----|--------|-------|---------|--------|
| <i>Source of Variation: Between Groups</i> | SS     | df | MS     | F     | P-value | F crit |
| <i>Soil moisture content</i>               | 277.70 | 3  | 92.57  | 8.24  | 0.00    | 2.82   |
| <i>Soil temperature</i>                    | 11.87  | 3  | 3.96   | 0.32  | 0.81    | 2.82   |
| $\delta^2\text{H}$                         | 436.73 | 3  | 145.58 | 7.20  | 0.00    | 2.88   |
| $\delta^{18}\text{O}$                      | 8.84   | 3  | 2.95   | 6.11  | 0.00    | 2.88   |
| <i>d-excess</i>                            | 10.77  | 3  | 3.59   | 2.64  | 0.06    | 2.88   |
| $\text{F}^-$                               | 0.81   | 3  | 0.27   | 3.03  | 0.04    | 2.91   |
| $\text{Cl}^-$                              | 5.59   | 3  | 1.86   | 0.74  | 0.53    | 2.91   |
| $\text{NO}_2^-$                            | 2.20   | 3  | 0.73   | 9.12  | 0.00    | 3.16   |
| $\text{NO}_3^-$                            | 1.39   | 3  | 0.46   | 1.83  | 0.16    | 2.91   |
| $\text{PO}_4^{3-}$                         | 0.55   | 3  | 0.18   | 1.15  | 0.35    | 3.16   |
| $\text{SO}_4^{2-}$                         | 101.87 | 3  | 33.96  | 2.84  | 0.05    | 2.91   |
| $\text{Na}^+$                              | 13.29  | 3  | 4.43   | 2.97  | 0.05    | 2.91   |
| $\text{NH}_4^+$                            | 25.13  | 3  | 8.38   | 11.33 | 0.00    | 2.91   |
| $\text{Mg}^{2+}$                           | 116.82 | 3  | 38.94  | 1.12  | 0.36    | 2.91   |
| $\text{K}^+$                               | 4.00   | 3  | 1.33   | 4.06  | 0.02    | 2.91   |
| $\text{Ca}^{2+}$                           | 54.94  | 3  | 18.31  | 0.16  | 0.92    | 2.91   |

**Table S4.** The result of the ANOVA test of soil temperature,  $\text{PO}_4^{3-}$ ,  $\text{Mg}^{2+}$ , and  $\text{Ca}^{2+}$  within the four groups.

| <i>ANOVA test</i>       |         |    |         |       |         |
|-------------------------|---------|----|---------|-------|---------|
|                         | SS      | df | MS      | F     | p-value |
| <i>soil temperature</i> | 6.13    | 3  | 2.05    | 0.04  | 0.99    |
| $\text{PO}_4^{3-}$      | 4.13    | 3  | 1.38    | 1.64  | 0.22    |
| $\text{Mg}^{2+}$        | 6792.36 | 3  | 2264.12 | 25.83 | 0.00*   |
| $\text{Ca}^{2+}$        | 1473.40 | 3  | 491.10  | 1.46  | 0.25    |

\*Significance at  $p < 0.05$ **Table S5.** The result of the Kruskal–Wallis test of soil moisture,  $\delta^2\text{H}$ ,  $\delta^{18}\text{O}$ , *d-excess*,  $\text{F}^-$ ,  $\text{Cl}^-$ ,  $\text{NO}_2^-$ ,  $\text{NO}_3^-$ ,  $\text{SO}_4^{2-}$ ,  $\text{Na}^+$ ,  $\text{NH}_4^+$ , and  $\text{K}^+$  within the four groups.

| <i>Kruskal–Wallis (KW) test</i> |    |                           |                   |         |
|---------------------------------|----|---------------------------|-------------------|---------|
|                                 | df | Critical Chi square value | K-W (H statistic) | p-value |
| <i>soil moisture</i>            | 3  | 7.82                      | 19.74             | 0.0002  |
| $\delta^2\text{H}$              | 3  | 7.82                      | 15.15             | 0.002   |
| $\delta^{18}\text{O}$           | 3  | 7.82                      | 12.75             | 0.01    |
| <i>d-excess</i>                 | 3  | 7.82                      | 4.25              | 0.24    |
| $\text{F}^-$                    | 3  | 7.82                      | 3.54              | 0.32    |
| $\text{Cl}^-$                   | 3  | 7.82                      | 1.57              | 0.67    |
| $\text{NO}_2^-$                 | 3  | 7.82                      | 13.98             | 0.003   |
| $\text{NO}_3^-$                 | 3  | 7.82                      | 13.63             | 0.004   |

|             |   |      |       |        |
|-------------|---|------|-------|--------|
| $SO_4^{2-}$ | 3 | 7.82 | 24.88 | 0.00   |
| $Na^+$      | 3 | 7.82 | 19.39 | 0.0002 |
| $NH_4^+$    | 3 | 7.82 | 15.97 | 0.001  |
| $K^+$       | 3 | 7.82 | 15.37 | 0.002  |

**Table S6.** The result of Tukey HSD post hoc comparison between groups. Statistically significant differences between group means are marked in italics.

*Tukey HSD test*

| <i>Parameter</i> |              | $Mg^{2+}$ (mg/l) |
|------------------|--------------|------------------|
| <i>Group</i>     | <i>Group</i> | mean difference  |
| <i>A</i>         | <i>2B</i>    | 5.40             |
| <i>A</i>         | <i>3BC</i>   | 32.32*           |
| <i>A</i>         | <i>C</i>     | 29.21*           |
| <i>2B</i>        | <i>3BC</i>   | 26.92*           |
| <i>2B</i>        | <i>C</i>     | 23.82*           |
| <i>3BC</i>       | <i>C</i>     | 3.10             |

\*Significance at  $p < 0.05$

**Table S7.** The result of the Mann–Whitney U post hoc comparison between groups. Statistically significant differences between group means are marked in italics.

*Mann–Whitney U test*

| <i>Parameter</i> |              | soil moisture<br>(%)   | $\delta^2\text{H}$<br>(‰) | $\delta^{18}\text{O}$<br>(‰) | $\text{NO}_2^-$<br>(mg/l) | $\text{NO}_3^-$<br>(mg/l) | $\text{SO}_4^{2-}$<br>(mg/l) | $\text{Na}^+$<br>(mg/l) | $\text{NH}_4^+$<br>(mg/l) | $\text{K}^+$<br>(mg/l) |
|------------------|--------------|------------------------|---------------------------|------------------------------|---------------------------|---------------------------|------------------------------|-------------------------|---------------------------|------------------------|
| <i>Group</i>     | <i>Group</i> | <i>mean difference</i> |                           |                              |                           |                           |                              |                         |                           |                        |
| A                | 2B           | 0.91                   | 0.20                      | 0.12                         | 1.11*                     | 0.12                      | 4.68*                        | 0.73                    | 0.01                      | 0.02                   |
| A                | 3BC          | 4.43*                  | 8.22*                     | 0.84*                        | 1.14*                     | 0.26                      | 8.97*                        | 2.94*                   | 3.80*                     | 1.05*                  |
| A                | C            | 13.32                  | 10.65*                    | 1.20*                        | 0.50                      | 4.48*                     | 0.23                         | 1.51                    | 0.29                      | 0.64*                  |
| 2B               | 3BC          | 3.52                   | 8.03*                     | 0.97*                        | 0.03                      | 0.13                      | 13.65*                       | 3.67*                   | 3.79*                     | 1.03*                  |
| 2B               | C            | 12.41*                 | 10.45*                    | 1.33*                        | 1.61*                     | 4.36*                     | 4.45*                        | 2.24*                   | 0.28                      | 0.62*                  |
| 3BC              | C            | 8.89*                  | 2.42                      | 0.36*                        | 1.64*                     | 4.22*                     | 9.20*                        | 1.42                    | 3.51*                     | 0.41                   |

\*Significance at  $p < 0.05$
